# Supplementary material for: Engineering of GlcNAc-1-Phosphotransferase for Production of Highly Phosphorylated Lysosomal Enzymes for Enzyme Replacement Therapy
Source: PubMed Central journal article supplement — Mol Ther Methods Clin Dev. 2017 Mar 29;5:59–65. doi: 10.1016/j.omtm.2017.03.006 (PMC5415318; doi:10.1016/j.omtm.2017.03.006), 2017-03-29
Supplement: mmc1.pdf [file mmc1.pdf]

**OMTM, Volume 5**

**Supplemental Information**

**Engineering of GlcNAc-1-Phosphotransferase for  
Production of Highly Phosphorylated Lysosomal  
Enzymes for Enzyme Replacement Therapy**

**Lin Liu, Wang-Sik Lee, Balraj Doray, and Stuart Kornfeld**

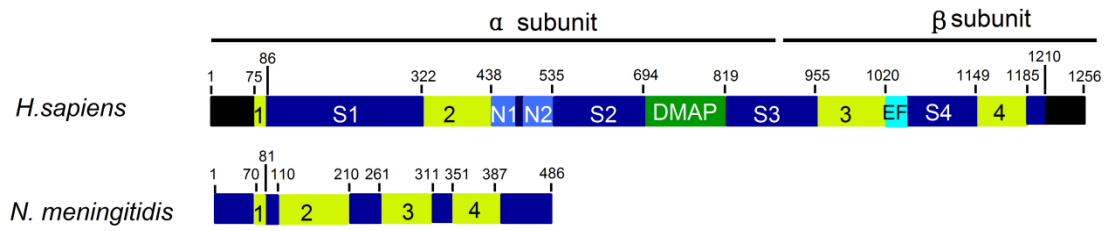

Supplementary Figure S1. **Organization of human**

**GlcNAc-1-phosphotransferase domain structure.** Modular organization of the different domains of human GlcNAc-1-phosphotransferase  $\alpha/\beta$  precursor and alignment with the *N. meningitidis* GlcNAc-1-phosphotransferase. See legend of Figure 1 for description of the various domains.

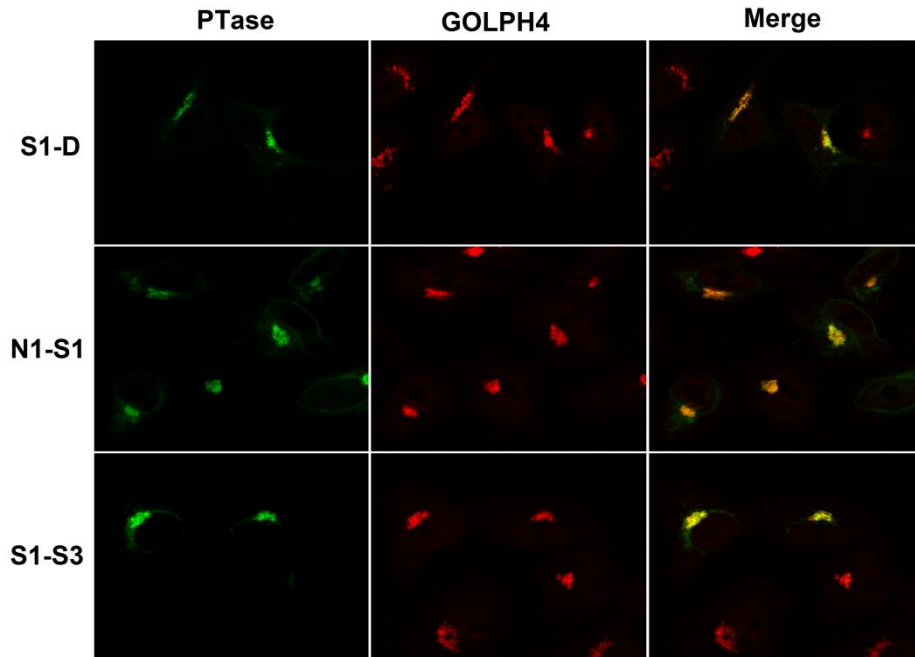

Supplementary Figure S2. **Golgi localization of  $\alpha/\beta$  precursor mutants.** Confocal immunofluorescence images of GNPTAB<sup>-/-</sup> HeLa cells transfected with the indicated mutant cDNAs, and colocalized with the Golgi markers GOLPH4, respectively (see Materials & Methods).

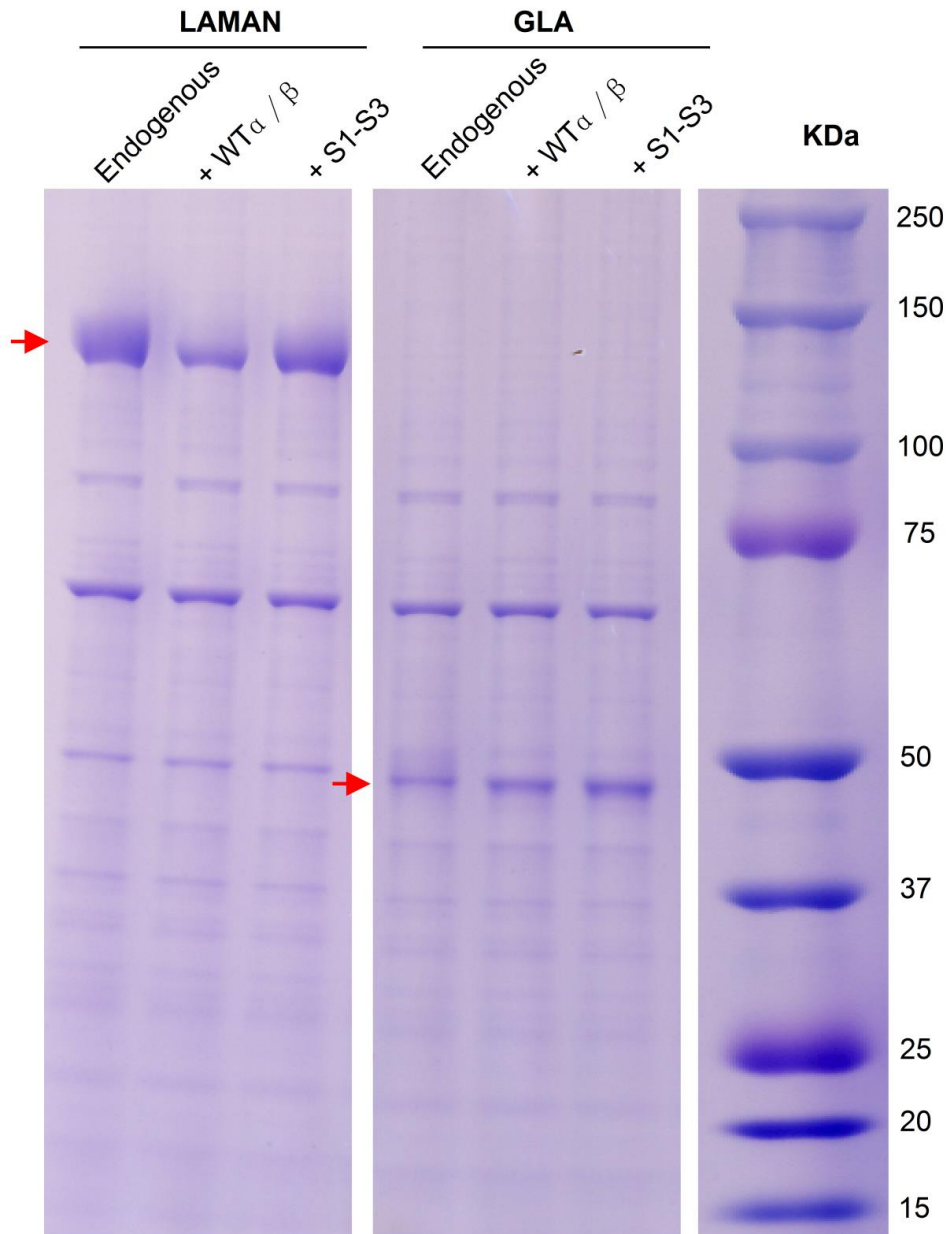

Supplementary Figure S3. **Enzyme production by Expi293 cells.** Media was collected from Expi293 cells transfected with either LAMAN or GLA cDNA, or co-transfected with the cDNA for the lysosomal enzyme together with the cDNA for WT  $\alpha/\beta$  precursor or the S1-S3 mutant. 10  $\mu$ l media were resolved by SDS-PAGE and the gel stained with Coomassie Brilliant Blue R-250. Red arrows indicate the migration of the secreted lysosomal enzyme.
